# Supplementary material for: Identification of Chinese Herbs Using a Sequencing-Free Nanostructured Electrochemical DNA Biosensor
Source: Sensors (Basel). 2015 Nov 30;15(12):29882–92. doi: 10.3390/s151229773 (PMC4721694; doi:10.3390/s151229773)
Supplement: Supplementary File 1 [file sensors-15-29773-s001.pdf]

# Supplementary Materials: Identification of Chinese Herbs Using a Sequencing-Free Nanostructured Electrochemical DNA Biosensor

Yan Lei <sup>1,2</sup>, Fan Yang <sup>1</sup>, Lina Tang <sup>1</sup>, Keli Chen <sup>2,\*</sup> and Guo-Jun Zhang <sup>1,\*</sup>

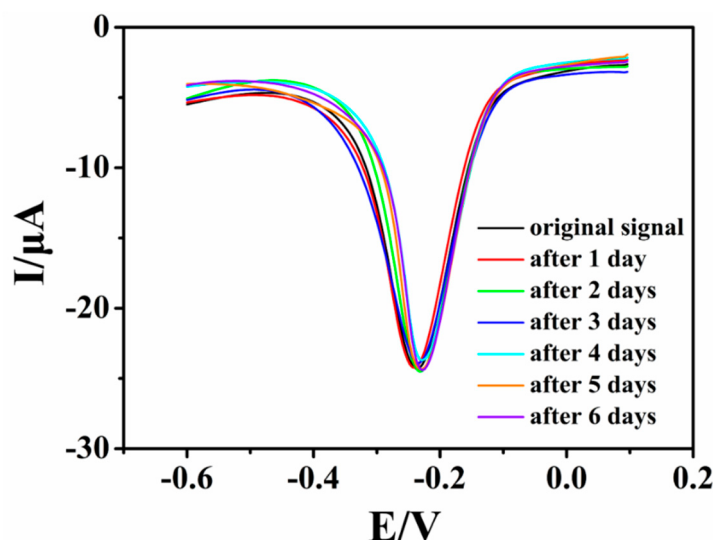

**Figure S1.** DPV diagrams of 10pM target DNA on AuNPs/RGO/GCE at different days.

**Table S1.** Comparison of the proposed method with other different modified electrodes for DNA detection.

| Electrodes                | Method | Linear Range | LOD (pM) | References |
|---------------------------|--------|--------------|----------|------------|
| ERGO/GCE                  | DPV    | 1 pM–100 nM  | 0.545    | [10]       |
| AuNPs/rGO/GCE             | DPV    | 0.1 pM–10 nM | 0.035    | [16]       |
| AuNPs/PANI/CS-GS/GCE      | DPV    | 10 pM–1 nM   | 2.11     | [11]       |
| AuNPs/pThion/graphene/GCE | DPV    | 0.1 pM–10 nM | 2.11     | [23]       |
| AuNPs/RGO/GCE             | DPV    | 100 fM–10 nM | 0.0117   | This work  |

Note: ERGO, electrochemical reduced graphene oxide; rGO, reduced graphene oxide; PANI, polyaniline; CS, chitosan; GS, graphene sheets; pThion, polythionine; GO, graphene oxide.
